# Supplementary material for: An Investigation of the JAZ Family and the CwMYC2-like Protein to Reveal Their Regulation Roles in the MeJA-Induced Biosynthesis of β-Elemene in Curcuma wenyujin
Source: Int J Mol Sci. 2023 Oct 9;24(19):15004. doi: 10.3390/ijms241915004 (PMC10573570; doi:10.3390/ijms241915004)
Supplement: Supplementary file 1 [file ijms-24-15004-s001.zip › Table S1.xlsx]

## Sheet: Sheet1
Table S1 Primer pairs
	Gene	F/R	Primer
For qRT-PCR	CwJAZ3	F	CAAGTGACCAGACGAAAGGC
		R	TTGCCCAAAGTCGTGTCC
	CwJAZ4	F	CACCCACGACCATGAGCTTG
		R	GCACTTACAGCACTCGCCTT
	CwJAZ5	F	AGATGGCAAGCAAAAGGAG
		R	GATTCTGTCTTTCCTCTTCTCAA
	CwJAZ6	F	CGCTAACCATCTTTTACAACGG
		R	TGGACTTGGTATGGAGCCTTG
	CwJAZ7	F	TTGGATGACTGCCGAAGG
		R	AAGGAGTCAATCCAAGCCAT
	CwJAZ8	F	AGATGACACGAACGACGAGC
		R	ATCCCTGGAGCATGAGACGG
	CwJAZ9	F	TTGGCAAGCAAGGGACC
		R	TCAAAAGTATCGGCATAGGGA
	CwJAZ10	F	AGCAGCAAGAACAGAAGAAGC
		R	ATCTGCGGCAAGGTTTCA
	CwJAZ11	F	GCTTCTGCCAATAAAACTGCT
		R	TTTCACTAGCGCACCTTCC
	CwJAZ12	F	GCTGAGGCCGCAAAGGTAA
		R	GGCAACTCTGTTTGGAGCA
	CwJAZ13	F	TAGGACGCTTCACCACCAG
		R	CCTGCGTGCTGTGGAAATAA
	CwJAZ14	F	CCACTGCTGATAACTTGACCTG
		R	TGGTTTCGACAGATTGGGTT
	CwJAZ15	F	AGGGAAAGTGAAGGGGAGG
		R	TGTGCTGGTTTTGACAGATTGA
	CwJAZ16	F	CAGCCCTTTGTAGAAGTATCAGA
		R	TTGGAGCCTCGTCGTTGT
	CwJAZ17	F	CCCTCACTGGAAACCCTTAC
		R	CCACATTTGGCGATTGATT
	CwJAZ18	F	GCCTCCATCAATAAAGCAAGA
		R	ATTGACATCAGGTGACGAAGAG
	CwJAZ19	F	CATCCTGGCAGCTTGAATACT
		R	TGGCTCGCTTCTTCTTTGTC
	CwJAZ20	F	CGAGCCGCAAAAGCAGA
		R	AGCCCCGCATTGAGCAT
	CwMYC2-like	F	AGCTCTTCCTGCTCCACTTC
		R	CGCCATTCCGCTTATCCT
	CwHMGS	F	TCTGCACTGAAGTGGAAGATGT
		R	CAACCAATCCATAGCGTCCA
	CwHMGR	F	CCCGATCCGCTATACTAACC
		R	CGATGGACTGGACGAAAGC
	CwFPPS	F	CTTTCTTGGTGGTGTCCTTGG
		R	GCTGTCTGAAACTCAACCTCGT
	CwDXS	F	CCCTCCCTCCAGGCTACAAA
		R	ATGGGTCTTGAGTGAGTCTGC
	CwDXR	F	TGTTTGGAGCAGACTACGACG
		R	AGCCTTAAAGGTCAGCGATT
	CwMCT	F	ACCAGCCAAAAGAACCACC
		R	CATCCAAGGCGTCGAGAT
	CwHDS	F	CGAGTATGTCTCCTGCCCATC
		R	GCTGAATTAGAGCGTCAGTTGC
	CwHDR	F	CCGCAGCGACAACTACAAC
		R	TCAACTCCCCAGCAGAACC
	18S	F	AACGAGACCTCAGCCTGCT
		R	CCCAGAACATCTAAGGGCAT
For yeast two hybrid	AD-CwJAZ1	F	ATATGGCCATGGAGGCCAGTATGGCGAGAGCAGTCGTGGA
		R	TATCGATGCCCACCCGGGTGGGGACCTGCAGCTGCCATCA
	AD-CwJAZ2	F	ATATGGCCATGGAGGCCAGTATGGAGTCTGGAACCGAAATGATC
		R	TATCGATGCCCACCCGGGTGTTTGCCGTGTGCTGAGGTGG
	AD-CwJAZ3	F	ATATGGCCATGGAGGCCAGTATGGCGAGAGGAGATACCAT
		R	TATCGATGCCCACCCGGGTGAAAGCTCGACGCTGACACAT
	AD-CwJAZ4	F	ATATGGCCATGGAGGCCAGTATGGTGGACGAGAAGATGGG
		R	TATCGATGCCCACCCGGGTGTTTGCTATTGTTTGAACTGTGATT
	AD-CwJAZ5	F	ATATGGCCATGGAGGCCAGTATGGTGGAGGAGAAGATGGG
		R	TATCGATGCCCACCCGGGTGTTTGCCAGCATCTGAACTGT
	AD-CwJAZ6	F	ATATGGCCATGGAGGCCAGTATGGCGGAGAAGATGGGCAA
		R	TATCGATGCCCACCCGGGTGTCTGCTGCTCTCACGACCAG
	AD-CwJAZ7	F	ATATGGCCATGGAGGCCAGTATGGCGGCGCGGAAGCA
		R	TATCGATGCCCACCCGGGTGAGGAGTCAATCCAAGCCATG
	AD-CwJAZ10	F	ATATGGCCATGGAGGCCAGTATGGAAAGGATGTGTGACGC
		R	TATCGATGCCCACCCGGGTGTCGTGCATGCTGAGGCTTAA
	AD-CwJAZ13	F	ATATGGCCATGGAGGCCAGTATGGCAGAGAAGATGAGCAA
		R	TATCGATGCCCACCCGGGTGTCTGCTGCTCTCACAACCAG
	AD-CwJAZ14	F	ATATGGCCATGGAGGCCAGTATGGCGGATGCGGCGC
		R	TATCGATGCCCACCCGGGTGTCTGTTATACTCGGAGCTTAGACTG
	AD-CwJAZ15	F	ATATGGCCATGGAGGCCAGTATGGCGGACGCGAGGAG
		R	TATCGATGCCCACCCGGGTGTCTGATATACTCAGAGTTTAGACTC
	AD-CwJAZ16	F	ATATGGCCATGGAGGCCAGTATGGAGAGGGATTTCTTAGGAA
		R	TATCGATGCCCACCCGGGTGTATTGTTAGCTCAGTGCTGATGG
	AD-CwJAZ17	F	ATATGGCCATGGAGGCCAGTATGGAGAGGGATTTCTTGGG
		R	TATCGATGCCCACCCGGGTGAAGCATCCATGCTGTTCTTG
	AD-CwJAZ20	F	ATATGGCCATGGAGGCCAGTATGGAGCCTGAGCTCAGGCT
		R	TATCGATGCCCACCCGGGTGTTGATCTGAAATGCTGTGATCTA
	AD-CwMYC2	F	ATATGGCCATGGAGGCCAGTATGGTTCCGTTCCTCTCCTC
		R	TATCGATGCCCACCCGGGTGGATGGGCTGACATAGGGCGA
	BD-CwJAZ1	F	ATATGGCCATGGAGGCCATGGCGAGAGCAGTCGTGGA
		R	TCGACGGATCCCCGGGGGACCTGCAGCTGCCATCA
	BD-CwJAZ2	F	ATATGGCCATGGAGGCCATGGAGTCTGGAACCGAAATGATC
		R	TCGACGGATCCCCGGTTTGCCGTGTGCTGAGGTGG
	BD-CwJAZ3	F	ATATGGCCATGGAGGCCATGGCGAGAGGAGATACCAT
		R	TCGACGGATCCCCGGAAAGCTCGACGCTGACACAT
	BD-CwJAZ4	F	ATATGGCCATGGAGGCCATGGTGGACGAGAAGATGGG
		R	TCGACGGATCCCCGGTTTGCTATTGTTTGAACTGTGATT
	BD-CwJAZ5	F	ATATGGCCATGGAGGCCATGGTGGAGGAGAAGATGGG
		R	TCGACGGATCCCCGGTTTGCCAGCATCTGAACTGT
	BD-CwJAZ6	F	ATATGGCCATGGAGGCCATGGCGGAGAAGATGGGCAA
		R	TCGACGGATCCCCGGTCTGCTGCTCTCACGACCAG
	BD-CwJAZ7	F	ATATGGCCATGGAGGCCATGGCGGCGCGGAAGCA
		R	TCGACGGATCCCCGGAGGAGTCAATCCAAGCCATG
	BD-CwJAZ10	F	ATATGGCCATGGAGGCCATGGAAAGGATGTGTGACGC
		R	TCGACGGATCCCCGGTCGTGCATGCTGAGGCTTAA
	BD-CwJAZ13	F	ATATGGCCATGGAGGCCATGGCAGAGAAGATGAGCAA
		R	TCGACGGATCCCCGGTCTGCTGCTCTCACAACCAG
	BD-CwJAZ14	F	ATATGGCCATGGAGGCCATGGCGGATGCGGCGC
		R	TCGACGGATCCCCGGTCTGTTATACTCGGAGCTTAGACTG
	BD-CwJAZ15	F	ATATGGCCATGGAGGCCATGGCGGACGCGAGGAG
		R	TCGACGGATCCCCGGTCTGATATACTCAGAGTTTAGACTC
	BD-CwJAZ16	F	ATATGGCCATGGAGGCCATGGAGAGGGATTTCTTAGGAA
		R	TCGACGGATCCCCGGTATTGTTAGCTCAGTGCTGATGG
	BD-CwJAZ17	F	ATATGGCCATGGAGGCCATGGAGAGGGATTTCTTGGG
		R	TCGACGGATCCCCGGAAGCATCCATGCTGTTCTTG
	BD-CwJAZ20	F	ATATGGCCATGGAGGCCATGGAGCCTGAGCTCAGGCT
		R	TCGACGGATCCCCGGTTGATCTGAAATGCTGTGATCTA
For transcriptional activation	BD-CwMYC2-like	F	ATATGGCCATGGAGGCCATGGTTCCGTTCCTCTCCTC
		R	TCGACGGATCCCCGGGATGGGCTGACATAGGGCGA
For overexpression	pBI121-CwMYC2-like	F	AGAACACGGGGGACTCTAGAATGGTTCCGTTCCTCTCCTC
		R	ATAAGGGACTGACCACCCGGGATGGGCTGACATAGGGCGA
