# Supplementary material for: An Investigation of the JAZ Family and the CwMYC2-like Protein to Reveal Their Regulation Roles in the MeJA-Induced Biosynthesis of β-Elemene in Curcuma wenyujin
Source: Int J Mol Sci. 2023 Oct 9;24(19):15004. doi: 10.3390/ijms241915004 (PMC10573570; doi:10.3390/ijms241915004)
Supplement: Supplementary file 1 [file ijms-24-15004-s001.zip › Table S2.xlsx]

## Sheet: Sheet1
Table S2 The sequences of identified JAZs in Curcuma wenyujin
Name	Amino acid sequence	Length	CDS	Length	ORF
JAZ1	MARAVVEIDFFAMENARSYSAVDRESAAGSGIDLSAFSAIDPLLLQRVVSSQAAFSDMPLTLPQVDRFFSKWPMPMPIPIPSVDPSCRSAMKKEIKSVTAPLTIFYNGKVSVFDLPRHKAEAIMKFAMESSGDVDHSGRLGLLAKFNHGLLPLARKKSLQRFLEKRKQRMMAAAGP	176	ATGGCGAGAGCAGTCGTGGAAATAGACTTCTTCGCCATGGAGAACGCACGGTCCTACAGCGCCGTGGATCGCGAGTCCGCCGCAGGCAGTGGAATCGATCTGAGCGCCTTCTCCGCGATCGATCCGCTTCTCTTGCAAAGAGTGGTCTCCTCGCAAGCCGCCTTCTCCGATATGCCGCTAACTCTGCCTCAGGTGGATCGATTCTTCTCCAAGTGGCCGATGCCGATGCCGATCCCGATCCCCTCTGTAGATCCGTCATGCAGGTCGGCGATGAAGAAGGAGATCAAATCGGTAACAGCGCCATTGACGATCTTTTACAACGGCAAGGTCTCTGTTTTCGATCTGCCGCGACATAAGGCGGAAGCTATAATGAAGTTTGCGATGGAAAGCAGCGGCGAC…	531	YES
JAZ2	MESGTEMIESPIGGEMVDQRTTVSNKGQKSKFSKTCSLLSQYMKEMGSLRGLALHMAPLNKSLAPTTTMNLLPGVGASREDQTENHQKREPPKSADLFRHNYGFDSEIKLMLKGQLTIFYGGKVLVFDDYPQDKAKNLMHMASKEGNIAAQHFCFSAADCHPKLDSASLPVSSPAPVAATPQVSLSKAIESDMPIARSNSLHRFLEKRKYRICTKAPYQVRGSPAPAIEAEPESSESRLNLGTQAEATSAHGK	253	ATGGAGTCTGGAACCGAAATGATCGAGTCACCCATTGGCGGAGAGATGGTGGATCAGAGGACGACGGTGAGTAACAAGGGACAGAAGTCCAAATTCTCTAAGACATGCAGCTTGTTGAGCCAGTACATGAAGGAGATGGGCAGCCTCCGCGGTCTCGCCCTTCACATGGCTCCATTAAATAAATCTTTGGCACCCACAACGACCATGAACCTGCTTCCTGGAGTCGGTGCGTCTCGAGAAGACCAAACTGAGAACCATCAAAAAAGAGAGCCCCCGAAATCGGCGGATCTCTTTCGCCATAACTACGGTTTTGATTCAGAAATCAAGCTGATGCTGAAGGGGCAGCTGACCATCTTCTATGGTGGCAAAGTACTGGTTTTTGACGATTACCCACAAGAC…	762	YES
JAZ3	MARGDTMVEHDFFQIEKQKAASFRAADGKSAARSRIQSVVSRINPQLLRSVIAHGAAKMPPAKAALLLSSSSSSSPPLPVTILNSSIRSTAEISNETAPLTIFYNGSVAVFDLPRDKAETILKLVETANDGSSSDQTKGLRLPEELDGELLPMARRKSLQRFIAKRQQRLTDAGPYVKKAVVVENPVMDTTLGNVSASSF	200	ATGGCGAGAGGAGATACCATGGTGGAGCACGATTTCTTCCAGATTGAGAAGCAGAAGGCGGCCAGCTTCCGGGCCGCGGATGGGAAAAGCGCCGCGCGAAGTAGGATCCAAAGCGTGGTGTCGAGGATCAACCCTCAGCTTCTCAGGAGCGTGATCGCCCACGGCGCCGCCAAGATGCCGCCGGCGAAGGCAGCCTTGCTTTTATCTTCTTCTTCTTCTTCGTCGCCGCCGCTGCCAGTGACGATCCTGAACTCCTCCATCAGATCGACTGCAGAGATTTCAAACGAAACGGCGCCGCTCACAATCTTCTACAACGGTTCGGTGGCCGTTTTCGACCTCCCACGAGACAAGGCAGAGACGATCTTGAAACTGGTGGAGACGGCGAACGACGGCAGTTCA…	603	YES
JAZ4	MVDEKMGSKDESSFSRTWRFLRQYLKENGSLGGLAPLDQGPQGKSRAPTTMSLFPGVDVSGEVQTQINQDKTSQKSMDLFPQDSTGKERVKALETKQKETHQLTIFYAGKVLVFNNYPAHKARDLMGMASKASAVSAGAECTSRPEPKLSTAAAPPPDSLPKPNSSDMPIARRHSLHRFLEKRKDRIHSKAPYQGNSSSSMKEAKPESSQPWLNLGREISDPNHSSNNSK	230	ATGGTGGACGAGAAGATGGGAAGCAAAGATGAGTCCAGCTTCTCCAGGACGTGGAGGTTCTTGCGCCAGTACTTGAAGGAGAATGGCAGCTTGGGAGGCCTTGCTCCTCTTGATCAAGGACCCCAAGGTAAATCTAGGGCACCCACGACCATGAGCTTGTTTCCAGGGGTAGATGTGTCAGGAGAGGTCCAAACACAGATCAATCAAGACAAAACCTCTCAGAAATCCATGGATCTTTTCCCCCAAGATTCAACAGGAAAAGAGCGTGTCAAAGCCCTAGAAACAAAGCAGAAGGAGACACACCAGCTAACGATCTTTTATGCTGGAAAGGTTCTTGTTTTCAACAATTACCCCGCCCACAAAGCCAGGGATCTGATGGGGATGGCAAGCAAGGCGAGT…	693	YES
JAZ5	MVEEKMGSKEESSFSRTCRLLSRYLREKGSLGGGLPPLDRRPQDKSREPKTINLFPGVDVLEQTHTQINQEKTSQKSMDLYPKQSTQGPANALEIKQMEMYQLTIFYAGEVLVFNNYPADRAKDLMQMASKRSIAAQSFSFSTPRIAAAGAECTSKPETKLAQDMPIMRRNSLHRFLEKRKDRIHSKAPYQGSPSSVNAAKPESSEPWLNLGRQISDHSSDAGK	224	ATGGTGGAGGAGAAGATGGGAAGCAAAGAGGAGTCCAGCTTCTCGAGGACGTGCAGGCTGTTGAGCCGGTACTTGAGGGAGAAGGGCAGCTTGGGAGGAGGCCTTCCGCCGCTTGATCGACGGCCGCAAGACAAATCTAGGGAACCCAAAACCATCAACTTGTTTCCAGGGGTAGATGTGCTAGAACAGACCCACACACAGATCAACCAAGAGAAAACCTCTCAGAAATCCATGGATCTTTACCCCAAACAATCAACACAAGGACCTGCCAATGCCTTAGAAATCAAGCAGATGGAGATGTACCAGCTCACTATCTTTTATGCCGGCGAGGTACTTGTTTTCAACAACTATCCCGCCGACAGAGCCAAGGACCTGATGCAGATGGCAAGCAAAAGGAGT…	675	YES
JAZ6	MAEKMGKSQFSLTCSLLSQYLKEKRSLGSISLDMTPRSLHHQAKEKPRSPTTLSLLPGVDVSAEDQSNPDKKTPISMELFPQRAGFDSPAKEEFVKIPSNTEEAGKASLTIFYNGKVLVFSDFPEAKAKDLIQMAGKESNLAVQKLASATGSQPPAPEQNPAAQPNSSDMPIARRNSLHRFLEKRKDRINTKAPYQVHGGGSPAPEAEGKPENGHPWLGLGRQAVKQEPGRESSR	235	ATGGCGGAGAAGATGGGCAAGTCTCAGTTCTCTCTCACTTGCAGCCTTTTGAGCCAATATTTGAAGGAAAAGAGGAGCCTTGGAAGCATCAGCCTTGACATGACCCCTAGGTCTCTTCATCACCAAGCTAAAGAGAAACCGAGATCTCCTACCACGTTGAGTTTGCTGCCAGGAGTGGATGTGTCCGCTGAGGATCAATCCAACCCTGACAAAAAAACTCCAATATCCATGGAATTATTTCCGCAGCGCGCAGGTTTTGATTCCCCTGCCAAGGAAGAATTTGTCAAGATTCCTTCAAACACGGAGGAGGCAGGGAAGGCTTCGCTAACCATCTTTTACAACGGCAAGGTGCTGGTTTTCAGCGATTTCCCGGAGGCGAAGGCCAAGGATCTGATACAA…	708	YES
JAZ7	MAARKQGRTNFAVACNLLSQCIKEKRSITNLGLGFDTRPQGDDKGNLEAFRPPTTMRLLPEAEISGEDDGEGGEAMELFPQRAEFNTASEEARGRGNPQLTIVYGGKVMVFDNFPPEKANDLLKLAGEGIKRNQNLGQESSSSEGSKDQNPTLESMVANSWMTAEGLARSAQPNLSDLPIARKASLQRFLEKRKDRINARAPYQLKTSGMDTPFKQEKSRSWLGLTP	227	ATGGCGGCGCGGAAGCAGGGGAGGACCAACTTCGCCGTCGCCTGCAACCTCCTCAGCCAATGCATCAAGGAGAAGAGAAGCATCACCAATTTGGGGCTCGGATTCGATACCCGACCGCAAGGCGATGATAAAGGCAATTTGGAGGCGTTTCGGCCGCCGACCACCATGCGTCTGCTGCCGGAAGCTGAGATCTCCGGAGAGGATGACGGGGAGGGTGGAGAGGCGATGGAGCTGTTTCCCCAGCGCGCTGAGTTCAACACTGCGTCGGAGGAGGCCAGAGGAAGAGGGAATCCCCAACTCACAATCGTCTACGGAGGGAAGGTCATGGTGTTCGACAACTTCCCTCCAGAGAAAGCCAACGATCTACTGAAGCTAGCAGGCGAGGGAATCAAGAGAAAC…	684	YES
JAZ8	MDDFQAQHEEQDFTNGNKFNLLPLTIFYNGKMKVYNAISQEKAEVIMLVASAAAKATRSASPAAGQFDGKVNLLNILQDDTNDELPMARSHSLQRFLEKRRERMMEKAPYNYYSANSLYVEGPSHAPGMPPFV	133	ATGGATGACTTCCAAGCACAGCACGAGGAACAGGACTTCACCAATGGAAACAAATTTAACTTACTGCCGCTGACCATCTTCTACAATGGAAAGATGAAAGTTTACAACGCAATTTCCCAGGAAAAGGCGGAGGTAATAATGCTGGTTGCGTCGGCGGCGGCGAAGGCGACGAGATCTGCTTCGCCGGCGGCGGGGCAGTTCGATGGCAAAGTTAATCTCTTGAACATCCTGCAAGATGACACGAACGACGAGCTGCCGATGGCAAGATCGCACTCGCTTCAGCGTTTCCTGGAGAAGCGCCGTGAAAGGATGATGGAGAAAGCCCCTTACAACTATTATTCAGCAAACTCTTTGTACGTGGAAGGGCCGTCTCATGCTCCAGGGATGCCTCCATTTGTG…	402	YES
JAZ9	MERDFIGILGRDSGDDATASRHEAALPSVKWPFSNMVSSTPQYMLTKIPQEEKPRKHVFNNHSSLRLNHISMDGLDVNLKTPHGLAAQKRVNLDKRGFSQYPRYTYQPFTSDSFAASLPHLDEIRMIPTFSDHGLPGTGSSPFSNIQHAHNVTVASPKQQFLGDQIGNCNFVGEPGSLNISWPIKMTGQLTIFYDGHVNVYDDISSDKVQEIISLASKGPNITPNVMNQTAHAHVPTILVAPTKMAGSIDSRTKRQESIIPMPILLNSGVLPSGTSNSVASSGGGLRMNTDAADSKAAVQLVPASQQEASKTSSAAFGSETAGTTMPKAVPQARKASLARFLEKRKERLTSAIPYSCSKMNPENGSGLESSNMSSISSSSEINISCNQKD	390	ATGGAGAGGGATTTCATCGGAATCCTCGGGCGAGACTCCGGCGATGACGCGACCGCGAGCCGCCATGAAGCAGCTCTCCCATCTGTGAAGTGGCCTTTCTCAAACATGGTCTCTTCTACACCGCAGTACATGCTTACCAAGATTCCACAAGAAGAGAAGCCTAGAAAACATGTTTTTAATAACCACTCATCTTTAAGATTGAATCATATATCCATGGATGGCCTTGATGTCAACCTAAAAACTCCCCATGGTTTAGCAGCTCAGAAACGTGTGAATCTTGATAAACGAGGCTTCAGTCAATATCCTCGGTATACATATCAGCCTTTTACCTCAGATTCTTTTGCTGCTTCACTCCCCCATTTGGATGAAATCCGAATGATCCCCACCTTCTCAGACCAC…	1173	YES
JAZ10	MERMCDAELRLSVGSQAAAGDGNNRTSNSVRLHRMESLLRFSTAHQQQEQKKQMTILYKGRIFVCDTTEMQARAIISMAEKMEEIIGKQNLINQHDQQQEAMAESTVLFSSPSSETLPQMLNPGLSMKRSLQRFLQKRKARIGEVTPYKQTPKLLFPLKPQHAR	164	ATGGAAAGGATGTGTGACGCTGAGCTCCGGCTCTCCGTTGGCAGTCAGGCCGCCGCCGGCGATGGTAACAACCGGACGTCCAACTCTGTGAGACTCCACAGGATGGAATCATTGTTAAGATTCTCAACAGCTCACCAGCAGCAAGAACAGAAGAAGCAAATGACGATCCTATATAAAGGCAGGATTTTTGTATGTGACACCACGGAGATGCAAGCAAGAGCAATCATATCCATGGCCGAGAAGATGGAAGAAATTATAGGAAAGCAAAACCTGATTAACCAACATGATCAGCAGCAAGAAGCCATGGCGGAGTCGACGGTTCTGTTTTCCTCTCCATCTTCTGAAACCTTGCCGCAGATGCTTAACCCGGGTCTGTCGATGAAGCGGTCGCTGCAGCGG…	495	YES
JAZ11	MGLFEAQSKVTSSDRSEIESVKTSAEGTPNFSLKDSAVTASETGIRNFPTTMPKQNPPAASQLIMFYGGSVSVYDAVSPEKAQAIMLIAAATAVASRASANKTASVAAATKAPAVVGSDAAAKAAQSPAAPVLTRTLSFLSSSASAEGALVKQPQLASYSSSSLSKLQAGRLLLPWLKNEEIVFFCICFKSNILLIISFHTSPELPIARRHSLQRFLEKRRDRVVSKAPYASSKPLDTAEMASEAQTQLI	250	ATGGGTCTCTTCGAGGCGCAGAGCAAGGTGACCTCCAGCGATCGGTCCGAGATCGAGTCCGTGAAGACTTCGGCGGAGGGAACCCCCAATTTCTCCCTCAAAGACTCCGCCGTCACCGCCTCTGAGACCGGCATCAGGAACTTTCCGACGACGATGCCAAAGCAAAACCCCCCGGCAGCATCGCAGCTCATCATGTTCTATGGCGGATCCGTGAGTGTGTATGACGCCGTTTCTCCAGAAAAAGCACAAGCTATCATGCTCATTGCTGCAGCCACGGCAGTGGCCTCGAGAGCTTCTGCCAATAAAACTGCTTCTGTGGCTGCTGCCACCAAGGCCCCAGCCGTAGTTGGTTCAGATGCTGCTGCTAAAGCTGCACAGTCACCGGCTGCGCCAGTGCTC…	753	YES
JAZ12	MERSEAVKKESRLNSLGRCSTMPTARPSFAASDSPLTIFYGGKARVFNAIPPEKAQAIMLIAATAAAEAAKVTLARAPAELDAAEVLGPALTRSLSLQSSTAEGGHSTSALFMLQTELPIARRHSLQRFLEKRRDRLANKTPYASAMSPDMEVASEGSSKLT	162	ATGGAACGATCCGAAGCCGTGAAGAAGGAATCGAGGTTGAACTCTCTCGGAAGGTGTTCGACGATGCCAACGGCGAGGCCATCGTTCGCCGCTTCGGATTCGCCGCTCACCATTTTCTACGGCGGCAAGGCTAGGGTTTTCAACGCGATCCCCCCAGAAAAGGCGCAGGCGATAATGCTCATCGCGGCCACCGCCGCCGCTGAGGCCGCAAAGGTAACCCTAGCAAGGGCTCCGGCGGAGCTCGACGCAGCTGAGGTCCTTGGGCCGGCGCTCACCAGATCTCTGTCACTTCAAAGCTCGACGGCGGAAGGAGGGCACTCTACTAGCGCTCTCTTCATGCTCCAAACAGAGTTGCCCATCGCAAGGAGGCACTCGCTTCAGCGTTTTCTGGAGAAGCGC…	489	YES
JAZ13	MAEKMSKSQFSLTCSRLSQYLKENGSFGSISLGMAPRTLHHQPKEKSGAPTTLSLLPGVDVSTEDQSYTEKNTLKSMELFPQHAGFDFPAKAPASTKEAEKAKLTIFYDGKVLVFDDFPEEKVRDLIQMAGRDSNLAAQKFASATGSQQPAPVQKPAAQPNVSDMPRKNSLHRFLEKRKDRINTKAAYQVHGGGSPAPVVAGKPEDGQAWLGLGRQAVKQEPGCESSR	228	ATGGCAGAGAAGATGAGCAAGTCTCAGTTTTCTCTCACATGCAGCCGCTTGAGCCAATACTTGAAGGAGAACGGGAGCTTTGGAAGTATCAGTCTTGGCATGGCCCCTAGGACGCTTCACCACCAGCCTAAAGAGAAATCAGGAGCTCCTACCACTTTGAGTTTGCTACCAGGAGTGGATGTGTCCACTGAGGACCAGTCCTACACAGAAAAGAATACTCTAAAATCCATGGAATTATTTCCACAGCACGCAGGATTCGATTTCCCTGCCAAGGCTCCTGCAAGCACCAAGGAGGCAGAAAAGGCTAAGTTGACCATCTTTTACGATGGCAAGGTGCTGGTTTTCGACGATTTCCCGGAGGAGAAGGTCAGGGATCTGATACAAATGGCAGGGAGAGAT…	687	YES
JAZ14	MADAARKQGSSNFAVACSLLSQYIKEKGGAADLGLGIAQVASKGKSESFQPPITMSLLPGADVSGGQDGERESEGEVVSQENPMDLFPQRTGFLTSPSLDSRVAQQSQLTIFYGGKVLVFDNFPAEKAKDLMQLASKGSSTADNLTCEPPSPLAEAVTSSRLCSHPKNSTLVPKAARNPVVPQPNLSKPAQPNLSDLPIARKVSLQRFLEKRKDRIYARAPYQMTPSPQVATSINQEDIKSWLGLGHHFATPGLSLSSEYNR	262	ATGGCGGATGCGGCGCGGAAGCAGGGGTCGAGCAACTTCGCGGTGGCCTGCAGTCTCCTCAGCCAGTACATCAAGGAGAAGGGCGGCGCGGCCGATTTAGGGCTCGGGATAGCCCAGGTAGCGTCTAAAGGCAAATCGGAGTCGTTTCAGCCGCCGATCACTATGAGCTTGCTGCCAGGGGCGGACGTCTCGGGCGGACAGGACGGCGAAAGGGAAAGCGAAGGGGAGGTCGTTTCCCAAGAGAACCCTATGGATCTCTTTCCCCAGCGTACTGGCTTCCTCACCTCACCGTCGCTGGATTCCAGGGTAGCGCAGCAATCACAACTTACAATCTTCTACGGAGGAAAGGTGCTGGTGTTCGACAATTTCCCAGCCGAGAAAGCTAAGGATCTGATGCAG…	789	YES
JAZ15	MADARRNRGLTNFAVACSLLSQYVKEKGSVADLGLGIAKAAPEGKSESFRVPITMNLLPRADVLGGEEGERESEGEVVSHENPMGLFPQSTGFLAPASDDSRVTEQSQLTIFYGGKVLVFDSFPAEKAKDLMQLASMGNSDQNSTLVPKAASDTVVPQLNLSKPAQPNLSDLPIARKASLTRFLEKRKDRISARAPYRITTPSPQVATSMNQEDFKSWLGLGRHSIAPGLSLNSEYIR	238	ATGGCGGACGCGAGGAGGAATCGGGGGCTGACCAACTTCGCCGTAGCCTGCAGTCTCCTCAGTCAGTACGTCAAGGAGAAAGGCAGCGTTGCCGATTTAGGGCTTGGGATCGCCAAGGCGGCCCCCGAAGGCAAATCGGAGTCGTTTCGTGTGCCGATCACTATGAATTTGCTGCCGAGGGCAGACGTTTTGGGCGGAGAGGAGGGAGAGAGGGAAAGTGAAGGGGAGGTGGTTTCCCATGAAAACCCTATGGGTCTCTTTCCCCAGAGTACCGGCTTCCTCGCCCCAGCGTCGGACGATTCCAGGGTGACAGAACAATCACAGCTTACAATCTTTTATGGAGGAAAGGTCCTGGTGTTCGACAGTTTCCCGGCCGAGAAAGCCAAGGATCTGATGCAA…	717	YES
JAZ16	MERDFLGIHSKILHPHAAKGDSRGIRHDAVEAILAGPSLQWPFSNKASAMQQFMLYKASQEERPRNHALPKHPSSRSQPLLNVAVFEPNQMAYPVLAPQNFFSQHSSHQLNPHRTVPLTGTPYFKAQNPPNSAASSSSFKLTEKQPFVEVSEVGSYSHRNMAKKNHRTAQLTVFYGGYVQVFDDVPSDKAQSIMSSLANRGPNEASVHAVSPSSGLSTWLFSNVPTGSKIDDTTTRLQQEANPRAIPQARKASLARFVEKRKQRLTSAMPYSCTKISSETDSGCNASSTSNSSADDTDLSRRRKASCFAGHLKNSTDSISTELTI	325	ATGGAGAGGGATTTCTTAGGAATTCACTCCAAAATTCTCCATCCTCATGCAGCCAAAGGAGACTCCCGTGGAATCCGCCACGATGCAGTCGAAGCTATTTTAGCAGGTCCATCGCTGCAGTGGCCTTTCTCAAACAAGGCGTCAGCCATGCAGCAGTTCATGCTCTACAAGGCTTCGCAAGAGGAGAGGCCAAGAAACCACGCTTTGCCCAAGCACCCTTCTTCTAGATCTCAACCTCTGCTAAACGTGGCTGTGTTCGAGCCCAATCAAATGGCTTACCCTGTTTTAGCTCCTCAGAATTTTTTCAGCCAACACTCAAGTCACCAGTTGAATCCGCATCGCACGGTTCCTCTAACTGGAACTCCTTACTTCAAAGCTCAGAATCCTCCCAATTCCGCT…	978	YES
JAZ17	MERDFLGTHARNFHPDAAKGDAAVLAGSPLQWPFSNKASAMHQFMLYKASQEERPRSHALRPQHLPKAAVFDPHHGAHHALASQNFPGGHSIHGTFCPSSRHFTIPLTGNPYFKVQNAHYSAPNSALKSTRKQPFLGGVEVGSFDHRSMAKQNHKAAAQLTIFYGGCVNVFDDVPFDKAQAVMSSLANQSPNVASNGKKIRSEASRPISNSVSTNQSSARVVSPPSTASNRCSKINNATTGLKLFAPPISVNQQQTIPRAIPQARKASLARFLEKRKERLTSAVPYASTKISTENDRGHNASSTSNSSADTNLSSYRMASRTAWML	326	ATGGAGAGGGATTTCTTGGGAACTCACGCCAGAAATTTCCACCCTGACGCAGCGAAGGGAGATGCAGCTGTTTTAGCAGGTTCACCGCTGCAGTGGCCTTTCTCAAACAAGGCGTCCGCCATGCATCAGTTCATGCTGTACAAGGCTTCGCAAGAGGAGAGGCCAAGAAGCCACGCTTTGAGACCTCAACATCTGCCAAAAGCTGCCGTCTTCGACCCCCATCATGGAGCTCACCATGCTTTAGCATCTCAGAATTTTCCTGGCGGGCACTCAATCCATGGCACTTTTTGCCCTTCGAGCCGCCACTTCACCATTCCCCTCACTGGAAACCCTTACTTCAAGGTTCAGAACGCTCACTACTCTGCTCCTAATTCAGCACTCAAGTCCACGAGGAAGCAG…	981	YES
JAZ18	MERDFLSIAGGGAEEEAIGSRHDSGSSRQWPSTKNASSLQQFIPLKVAQEDRTNTFSFDMLSSPMFQHMKVANAFDVNHANSPAFSQQKSFSLHDSPLQITAGLSASCRRGSGTRSFPMTSSNSNVNSDPFFKFHNARHQFGGATLNNPFVNILAKGDTLTPEASPIQSQTIWKGGKSQGTSSWPSGPLHERVRQPAGHSASIGNRPLDLIMAAPMQELSEPASRSNPFVNMNIGTLAPRNMPMVTQMTAQLTIFYAGTVHVYDDVSFDKAEAIIASVSQGSNSKGTLNASRSEAPFKVTAPVPTNFPASDSLSTKQILCPTPLRAVSPCSGFSNPMLVTPMAGSNSSSFSTESDTVGAKIVSSLPPSIKQEPSRPLPSAFGSTVSVATYSRAVPQARK…	459	ATGGAGAGGGACTTCTTGAGCATCGCCGGAGGTGGGGCGGAGGAGGAAGCCATAGGCAGCCGCCATGATTCAGGTTCATCGAGGCAGTGGCCTTCGACAAAGAATGCATCTTCCTTGCAGCAGTTCATTCCCTTAAAGGTTGCACAAGAGGATAGAACAAACACTTTCAGCTTTGATATGTTGTCCTCACCCATGTTTCAGCATATGAAAGTTGCTAATGCTTTCGATGTTAATCATGCTAATTCTCCTGCGTTTTCACAGCAGAAATCATTCAGTCTGCATGATAGTCCACTTCAGATCACTGCTGGCCTCAGTGCTTCCTGTCGCCGGGGAAGTGGAACCAGAAGTTTTCCAATGACCTCATCTAATTCTAATGTGAATAGCGACCCTTTCTTCAAG…	1380	YES
JAZ19	MERDFLGILGRDSGGAAAAGRCEAALPSVKWPFSNMVSTTQRLRLPKYPQEEKPRKDVFNNHSSLRFHHLPFMDAIEDNQKTPHVLEAQNCLDFDKQGFSQYPQYACQPSKAESFSALHHQLNELPTFPVFLDYDFPVTDSSPFSSIQYAHNNPNVRAAYPKQQFLGGQIGPSNFVGHPGSLNTPWPTKMTAQLTIFYAGRVNVYDDVSSDKVQEIISLASHGSNVNSNIMDQTAHAPIPTTATSMAPTKMARSIDSRTKKKRAIIPALKNQGISSSITSHSVAISLGGFRMNNNAAGSKAAFQLVPANQQGAATETNIPKAVPQARKASLTRFLEKRKERLTSAMPYSCSKITPESGNVSSLSSLTDINLSGNGKDSSLTADQKSSIESEESLSTE	397	ATGGAGAGAGACTTCCTCGGAATTCTCGGGCGGGATTCAGGCGGCGCCGCCGCCGCGGGCCGCTGCGAAGCAGCTCTCCCATCAGTGAAGTGGCCTTTCTCAAATATGGTATCTACCACCCAGCGGCTCAGGCTCCCCAAGTATCCACAAGAAGAGAAGCCTAGGAAAGATGTCTTTAATAACCATTCATCTTTAAGATTTCATCATTTGCCTTTTATGGATGCCATTGAGGACAATCAGAAAACTCCCCATGTTTTAGAAGCTCAGAATTGTTTGGATTTTGATAAACAAGGCTTCAGTCAATACCCCCAGTATGCATGTCAGCCTTCTAAAGCTGAATCCTTCTCTGCTTTGCACCACCAGTTGAATGAACTCCCGACATTTCCTGTCTTCTTGGAC…	1194	YES
JAZ20	MEPELRLSLGTGEPQKQMTIFYKGRVSVCSATEIQAKAILSMAKREMEEEEKKVMMKQEIAPQVMLNAGLSMKRSLQRFLQKRKARIHDASASPYAAHANLKRMQCIDHSISDQ	114	ATGGAGCCTGAGCTCAGGCTTTCGCTCGGCACCGGCGAGCCGCAAAAGCAGATGACCATCTTCTACAAGGGCAGGGTTAGCGTCTGCAGTGCCACTGAGATCCAGGCCAAAGCGATCCTGTCTATGGCGAAGAGGGAGATGGAAGAAGAAGAAAAGAAGGTCATGATGAAGCAAGAAATAGCTCCACAAGTGATGCTCAATGCGGGGCTATCCATGAAGAGATCTCTGCAGAGGTTTCTGCAGAAGAGGAAGGCCAGAATCCACGATGCCTCAGCGTCTCCCTACGCTGCTCATGCCAACCTCAAGCGGATGCAGTGCATAGATCACAGCATTTCAGATCAATAA	345	YES
MYC2-like	MVPFLSSASTAADSHDVRWPRPPALPPVPVPSSSCSTSSSHTTMTSSAPPQLIPDNLQQRLHSLIEYASETWTYAIFWQSSGGGSPVLSWGDGYYKGCEEDKRNGASTTPEEKEHRKRVLRELNALISGSVDEGADEEVTDTEWFFLVSMSQNFTAGASLPGQALLAGSPAWIAGDYSMAAAPCERVRQARAFGLRTMACVPLGGGCGVVELGSTHEISQSSEILSKLRFLFTHSGAARPEAGSWPPAPPQAMELGFVAEPSMPWPSMAPKPSPRMEKPTASCLTETLVPIHMTQDLNFTASDCEALYIDKHISFEGSKNSSAATAAPTLEEGNCGLFGGDSDQSDLEASAREVTSVAAATDPEKPRPKKRGRKPANGREVPLDHVEAERQRREKLNQR…	548	ATGGTTCCGTTCCTCTCCTCCGCTTCCACCGCCGCCGACAGCCACGACGTCCGCTGGCCGCGACCGCCGGCGCTACCCCCCGTCCCTGTCCCGAGCTCTTCCTGCTCCACTTCCTCGTCGCACACCACTATGACCTCTTCTGCGCCGCCGCAATTGATCCCGGACAACCTGCAGCAGCGTCTCCACTCCCTCATCGAGTACGCCAGCGAGACCTGGACCTACGCCATCTTCTGGCAGTCCTCCGGCGGCGGTTCCCCCGTCCTCAGCTGGGGCGACGGGTACTACAAAGGCTGCGAGGAGGATAAGCGGAATGGCGCGTCGACCACGCCGGAGGAGAAGGAGCACCGGAAGCGCGTGCTCCGGGAGCTGAACGCACTCATCTCCGGCAGCGTTGACGAA…	1647	YES
